# Supplementary material
Source: Springer Nature journal article supplement (https://www.springermedizin.de/resource/supplementary/12889_2013_6885_MOESM2_ESM.pdf/9499264)
Supplement: MOESM2 [file 9499264]

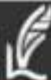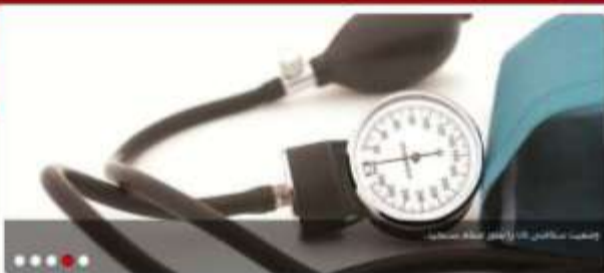

تجهیزات سنجش فشارخون در منزل

#### به پایگاه آموزشی قلب سالم خوش آمدید

پایگاه آموزشی قلب سالم، مجموعه‌ای از منابع آموزشی، اطلاعات تخصصی، در زمینه‌های مختلف سلامت قلب در اختیار شما قرار می‌دهد. آیا می‌دانید که امروزه بیماریهای قلبی و عروقی از مهمترین عوامل مرگ و میر در سراسر جهان و ایران هستند. آیا می‌دانید که سلامت قلب و عروق، کلید اصلی برای پیشگیری از این بیماریهاست. قلب سالم، کلید سلامتی است. در اینجا، ما به شما کمک می‌کنیم تا با رعایت سبک زندگی سالم، خطر ابتلا به این بیماریها را کاهش دهید. برای اطلاعات بیشتر، لطفاً به این بخش مراجعه کنید.

[ادامه مطلب]

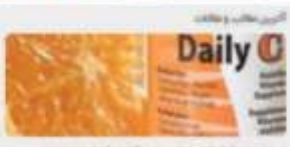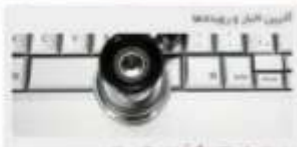

شماره تلفن:

کلمه عبور:

فرمانده به خاطر بسازید
